# Supplementary material for: Large and fast human pyramidal neurons associate with intelligence
Source: eLife journal article supplement (doi:10.7554/elife.41714), 2018-12-18
Supplement: supp [file elife-41714-supp-v1.zip]

Archive with 4 entries (4 files):
- elife_poa_e41714_Transparent_Reporting_File.pdf
- elife_poa_e41714_Figure_1_figure_supplement_2.pdf
- elife_poa_e41714_Figure_1_figure_supplement_1.pdf
- elife_poa_e41714_Source_data_1.xlsx
