# Supplementary material for: Large and fast human pyramidal neurons associate with intelligence
Source: eLife journal article supplement (doi:10.7554/elife.41714), 2018-12-18
Supplement: supp [file elife_poa_e41714_Source_data_1.xlsx]

## Sheet: Sheet1
		Patient data (Table 1, Figure 1 -figure supplement 1,2)								Cellular morphology data (Figure 3)				Cellular e-phys data (Figure 5)								Crtical thickness data (Figure 2)				Modelling (Figure 4)
Patient number	Cell id	'IQ'	'Gender'	'Age at resection, yrs	'Age at disease onset, yrs	Disease duration, yrs	Seizure frequency, number per month	Diagnosis	Hemisphere of resection	'Cortical depth of the cell from pia, um'	'TDL, mm'	'Number of branch points'	'Relative cortical depth'	First AP rise speed	'APriseSpeed All First APs bin1'	'APriseSpeed_0_10Hz_bin2'	'APriseSpeed_10_20Hz_bin3'	'APriseSpeed_20_30Hz_bin4'	'APriseSpeed_30_40Hz_bin5'	'APriseSpeed 20-40 Hz'	'APriseSpeed 20-40 Hz relative values'	'Average cortical thickness temporal lobe, mm'	'Cortical Thickness Left, mm'	'Cortical Thickness Right, mm'	'Cortical Thickness resected hemisphere, mm'	Cut-off frequency [Hz]	Phase slope [1/ms]
1	P001_Cell01M	88	'Male'	41.25	5.91667	35.3333	2	'Tumor'	'Right'	978	14.344	56	0.408041	NaN	NaN	NaN	NaN	NaN	NaN	NaN	NaN	2.4453	2.49121	2.39682	2.39682
1	P001_Cell02M	88	'Male'	41.25	5.91667	35.3333	2	'Tumor'	'Right'	1029	15.2106	67	0.42932	NaN	NaN	NaN	NaN	NaN	NaN	NaN	NaN	2.4453	2.49121	2.39682	2.39682
1	P001_Cell03M	88	'Male'	41.25	5.91667	35.3333	2	'Tumor'	'Right'	1071	16.8868	74	0.446843	NaN	NaN	NaN	NaN	NaN	NaN	NaN	NaN	2.4453	2.49121	2.39682	2.39682
1	P001_Cell04M	88	'Male'	41.25	5.91667	35.3333	2	'Tumor'	'Right'	1168	19.7201	85	0.487313	NaN	NaN	NaN	NaN	NaN	NaN	NaN	NaN	2.4453	2.49121	2.39682	2.39682
2	P002_Cell01M	78	'Female'	20.5	10.6667	9.83333	32	'Other'	'Right'	616	14.364	55	0.22434	NaN	NaN	NaN	NaN	NaN	NaN	NaN	NaN	2.73293	2.71688	2.74583	2.74583	338.678	17.2619
2	P002_Cell02	78	'Female'	20.5	10.6667	9.83333	32	'Other'	'Right'	NaN	NaN	NaN	NaN	541.992	560.913	512.085	493.693	504.761	520.019	512.39	0.913493	2.73293	2.71688	2.74583	2.74583	331.01	21.666
2	P002_Cell02M	78	'Female'	20.5	10.6667	9.83333	32	'Other'	'Right'	620	16.7408	64	0.225797	NaN	NaN	NaN	NaN	NaN	NaN	NaN	NaN	2.73293	2.71688	2.74583	2.74583	338.678	19.8537
2	P002_Cell03	78	'Female'	20.5	10.6667	9.83333	32	'Other'	'Right'	NaN	NaN	NaN	NaN	292.358	301.514	242.732	237.601	260.01	NaN	260.01	0.862348	2.73293	2.71688	2.74583	2.74583	362.879	28.3709
2	P002_Cell04	78	'Female'	20.5	10.6667	9.83333	32	'Other'	'Right'	NaN	NaN	NaN	NaN	306.396	305.176	228.929	210.46	237.427	240.478	238.953	0.783	2.73293	2.71688	2.74583	2.74583	407.3	15.5326
2	P002_Cell05	78	'Female'	20.5	10.6667	9.83333	32	'Other'	'Right'	NaN	NaN	NaN	NaN	446.167	450.107	363.037	350.727	394.287	384.521	389.404	0.865138	2.73293	2.71688	2.74583	2.74583
2	P002_Cell06	78	'Female'	20.5	10.6667	9.83333	32	'Other'	'Right'	NaN	NaN	NaN	NaN	270.386	284.424	260.925	251.909	267.334	NaN	267.334	0.939914	2.73293	2.71688	2.74583	2.74583	467.519	19.9252
2	P002_Cell07	78	'Female'	20.5	10.6667	9.83333	32	'Other'	'Right'	NaN	NaN	NaN	NaN	257.568	272.339	224.261	218.506	241.089	238.037	239.563	0.87965	2.73293	2.71688	2.74583	2.74583
2	P002_Cell08	78	'Female'	20.5	10.6667	9.83333	32	'Other'	'Right'	NaN	NaN	NaN	NaN	296.631	306.295	262.592	269.775	276.489	NaN	276.489	0.90269	2.73293	2.71688	2.74583	2.74583
2	P002_Cell09	78	'Female'	20.5	10.6667	9.83333	32	'Other'	'Right'	NaN	NaN	NaN	NaN	324.097	326.08	250.549	223.321	268.555	NaN	268.555	0.823584	2.73293	2.71688	2.74583	2.74583
3	P003_Cell01	119	'Female'	66	63	3	0.25	'Tumor'	'Left'	NaN	NaN	NaN	NaN	366.211	352.097	340.184	318.298	310.232	324.585	317.408	0.901481	2.5596	2.59073	2.52837	2.59073
3	P003_Cell02	119	'Female'	66	63	3	0.25	'Tumor'	'Left'	NaN	NaN	NaN	NaN	397.339	370.701	350.952	336.932	333.902	318.066	325.984	0.879372	2.5596	2.59073	2.52837	2.59073
3	P003_Cell03	119	'Female'	66	63	3	0.25	'Tumor'	'Left'	NaN	NaN	NaN	NaN	485.84	489.197	456.155	439.594	446.777	NaN	446.777	0.913288	2.5596	2.59073	2.52837	2.59073
3	P003_Cell04	119	'Female'	66	63	3	0.25	'Tumor'	'Left'	NaN	NaN	NaN	NaN	478.516	468.018	449.137	430.984	NaN	NaN	NaN	NaN	2.5596	2.59073	2.52837	2.59073
3	P003_Cell05	119	'Female'	66	63	3	0.25	'Tumor'	'Left'	NaN	NaN	NaN	NaN	472.412	463.053	431.213	436.401	419.311	NaN	419.311	0.905536	2.5596	2.59073	2.52837	2.59073
3	P003_Cell06	119	'Female'	66	63	3	0.25	'Tumor'	'Left'	NaN	NaN	NaN	NaN	480.957	465.851	439.331	432.943	437.622	NaN	437.622	0.939404	2.5596	2.59073	2.52837	2.59073
3	P003_Cell07	119	'Female'	66	63	3	0.25	'Tumor'	'Left'	NaN	NaN	NaN	NaN	462.646	473.565	429.077	418.793	442.657	430.908	436.783	0.922329	2.5596	2.59073	2.52837	2.59073
3	P003_Cell08	119	'Female'	66	63	3	0.25	'Tumor'	'Left'	NaN	NaN	NaN	NaN	404.053	416.815	381.944	363.932	NaN	366.211	366.211	0.878594	2.5596	2.59073	2.52837	2.59073
4	P004_Cell01M	88	'Female'	31.25	16.0833	15.1667	12.9	'Tumor'	'Left'	547	8.84006	40	0.232079	NaN	NaN	NaN	NaN	NaN	NaN	NaN	NaN	2.42099	2.35695	2.48201	2.35695
4	P004_Cell02M	88	'Female'	31.25	16.0833	15.1667	12.9	'Tumor'	'Left'	548	9.13905	41	0.232503	NaN	NaN	NaN	NaN	NaN	NaN	NaN	NaN	2.42099	2.35695	2.48201	2.35695
4	P004_Cell02N	88	'Female'	31.25	16.0833	15.1667	12.9	'Tumor'	'Left'	NaN	NaN	NaN	NaN	291.138	301.971	237.122	221.497	212.199	186.768	199.483	0.660603	2.42099	2.35695	2.48201	2.35695
4	P004_Cell04N	88	'Female'	31.25	16.0833	15.1667	12.9	'Tumor'	'Left'	NaN	NaN	NaN	NaN	443.115	450.897	406.823	373.914	408.325	394.287	401.306	0.890017	2.42099	2.35695	2.48201	2.35695
4	P004_Cell05N	88	'Female'	31.25	16.0833	15.1667	12.9	'Tumor'	'Left'	NaN	NaN	NaN	NaN	313.11	313.339	274.556	250.271	264.893	NaN	264.893	0.845386	2.42099	2.35695	2.48201	2.35695	288.245	15.9036
4	P004_Cell15	88	'Female'	31.25	16.0833	15.1667	12.9	'Tumor'	'Left'	NaN	NaN	NaN	NaN	216.675	216.239	192.566	176.086	160.326	163.167	161.747	0.748001	2.42099	2.35695	2.48201	2.35695	281.674	15.613
5	P005_Cell02	81	'Female'	51	6	45	6.45	'Other'	'Right'	NaN	NaN	NaN	NaN	353.699	344.543	315.552	308.505	298.087	298.276	298.182	0.86544	NaN	NaN	NaN	NaN
6	P006_Cell02	69	'Female'	58	45.5833	12.4167	1	'MTS'	'Left'	NaN	NaN	NaN	NaN	174.866	153.978	117.737	110.626	119.934	NaN	119.934	0.778903	2.39422	2.39524	2.39326	2.39524
6	P006_Cell07	69	'Female'	58	45.5833	12.4167	1	'MTS'	'Left'	528	6.2613	27	0.220437	NaN	NaN	NaN	NaN	NaN	NaN	NaN	NaN	2.39422	2.39524	2.39326	2.39524
6	P006_Cell09	69	'Female'	58	45.5833	12.4167	1	'MTS'	'Left'	NaN	NaN	NaN	NaN	271.606	247.236	216.37	177.185	158.997	143.602	151.299	0.611963	2.39422	2.39524	2.39326	2.39524
6	P006_Cell12	69	'Female'	58	45.5833	12.4167	1	'MTS'	'Left'	NaN	NaN	NaN	NaN	312.5	275.617	258.56	219.366	199.759	177.414	188.586	0.684233	2.39422	2.39524	2.39326	2.39524
7	P007_Cell01M	107	'Male'	27.6667	24.0833	3.58333	60	'Tumor'	'Left'	986	15.3098	61	NaN	NaN	NaN	NaN	NaN	NaN	NaN	NaN	NaN	NaN	NaN	NaN	NaN
7	P007_Cell02	107	'Male'	27.6667	24.0833	3.58333	60	'Tumor'	'Left'	NaN	NaN	NaN	NaN	414.734	386.848	368.856	318.816	323.029	318.502	320.765	0.829175	NaN	NaN	NaN	NaN	245.428	12.752
7	P007_Cell02M	107	'Male'	27.6667	24.0833	3.58333	60	'Tumor'	'Left'	1008	14.5529	61	NaN	NaN	NaN	NaN	NaN	NaN	NaN	NaN	NaN	NaN	NaN	NaN	NaN
7	P007_Cell03M	107	'Male'	27.6667	24.0833	3.58333	60	'Tumor'	'Left'	1049	17.5402	88	NaN	NaN	NaN	NaN	NaN	NaN	NaN	NaN	NaN	NaN	NaN	NaN	NaN	316.228	27.7122
7	P007_Cell04M	107	'Male'	27.6667	24.0833	3.58333	60	'Tumor'	'Left'	1084	14.5223	58	NaN	NaN	NaN	NaN	NaN	NaN	NaN	NaN	NaN	NaN	NaN	NaN	NaN	346.541	20.2915
7	P007_Cell05M	107	'Male'	27.6667	24.0833	3.58333	60	'Tumor'	'Left'	1496	12.5634	40	NaN	NaN	NaN	NaN	NaN	NaN	NaN	NaN	NaN	NaN	NaN	NaN	NaN
7	P007_Cell06	107	'Male'	27.6667	24.0833	3.58333	60	'Tumor'	'Left'	NaN	NaN	NaN	NaN	346.985	331.268	310.253	301.514	NaN	282.44	282.44	0.852602	NaN	NaN	NaN	NaN	288.245	25.5239
7	P007_Cell20	107	'Male'	27.6667	24.0833	3.58333	60	'Tumor'	'Left'	1058	14.5289	46	NaN	381.47	367.432	330.811	NaN	NaN	NaN	NaN	NaN	NaN	NaN	NaN	NaN
8	P008_Cell01M	115	'Female'	29.3333	12.75	16.5833	32.1667	'MTS'	'Left'	1352	27.7158	127	0.552601	NaN	NaN	NaN	NaN	NaN	NaN	NaN	NaN	2.50956	2.44661	2.57147	2.44661	338.678	20.8726
8	P008_Cell04	115	'Female'	29.3333	12.75	16.5833	32.1667	'MTS'	'Left'	974	12.6862	52	0.398102	343.628	346.68	346.985	319.933	315.41	301.583	308.497	0.889861	2.50956	2.44661	2.57147	2.44661
8	P008_Cell05	115	'Female'	29.3333	12.75	16.5833	32.1667	'MTS'	'Left'	791	13.3588	61	0.323304	404.663	393.906	352.211	339.277	316.493	333.862	325.178	0.825521	2.50956	2.44661	2.57147	2.44661
8	P008_Cell06	115	'Female'	29.3333	12.75	16.5833	32.1667	'MTS'	'Left'	NaN	NaN	NaN	NaN	424.5	408.63	378.832	356	NaN	379.944	379.944	0.929798	2.50956	2.44661	2.57147	2.44661	338.678	23.3535
8	P008_Cell07	115	'Female'	29.3333	12.75	16.5833	32.1667	'MTS'	'Left'	NaN	NaN	NaN	NaN	356.14	332.913	324.364	307.088	281.514	282.099	281.807	0.846488	2.50956	2.44661	2.57147	2.44661
8	P008_Cell08	115	'Female'	29.3333	12.75	16.5833	32.1667	'MTS'	'Left'	NaN	NaN	NaN	NaN	340.576	314.908	298.157	278.015	269.538	277.939	273.738	0.869266	2.50956	2.44661	2.57147	2.44661	218.653	14.2665
8	P008_Cell14	115	'Female'	29.3333	12.75	16.5833	32.1667	'MTS'	'Left'	1052	18.8902	83	0.429982	275.879	267.982	262.044	252.239	232.612	222.212	227.412	0.848607	2.50956	2.44661	2.57147	2.44661	190.482	15.4721
9	P009_Cell01M	125	'Male'	20.25	15.6667	4.58333	2	'Tumor'	'Right'	1164	22.5161	84	0.402485	NaN	NaN	NaN	NaN	NaN	NaN	NaN	NaN	2.83371	2.77536	2.89203	2.89203
9	P009_Cell01N	125	'Male'	20.25	15.6667	4.58333	2	'Tumor'	'Right'	NaN	NaN	NaN	NaN	453.491	441.013	417.643	398.27	398.865	403.442	401.154	0.909619	2.83371	2.77536	2.89203	2.89203
9	P009_Cell02N	125	'Male'	20.25	15.6667	4.58333	2	'Tumor'	'Right'	NaN	NaN	NaN	NaN	360.718	369.67	325.817	311.279	300.293	NaN	300.293	0.812328	2.83371	2.77536	2.89203	2.89203
9	P009_Cell12	125	'Male'	20.25	15.6667	4.58333	2	'Tumor'	'Right'	NaN	NaN	NaN	NaN	368.042	370.822	342.689	329.618	324.097	346.985	335.541	0.904856	2.83371	2.77536	2.89203	2.89203	398.107	18.5781
9	P009_Cell13	125	'Male'	20.25	15.6667	4.58333	2	'Tumor'	'Right'	NaN	NaN	NaN	NaN	245.667	243.034	228.664	208.923	194.802	200.424	197.613	0.813107	2.83371	2.77536	2.89203	2.89203	426.37	22.8249
9	P009_Cell14	125	'Male'	20.25	15.6667	4.58333	2	'Tumor'	'Right'	960	16.3411	71	0.331947	403.137	385.132	365.363	349.076	330.931	342.712	336.822	0.874562	2.83371	2.77536	2.89203	2.89203
9	P009_Cell17	125	'Male'	20.25	15.6667	4.58333	2	'Tumor'	'Right'	NaN	NaN	NaN	NaN	364.075	366.478	357.788	342.554	322.032	307.617	314.824	0.859054	2.83371	2.77536	2.89203	2.89203
9	P009_Cell18	125	'Male'	20.25	15.6667	4.58333	2	'Tumor'	'Right'	NaN	NaN	NaN	NaN	389.709	387.306	351.613	345.527	333.583	351.028	342.306	0.883811	2.83371	2.77536	2.89203	2.89203
10	P010_Cell01	84	'Female'	27.4167	14	13.4167	120	'Tumor'	'Right'	NaN	NaN	NaN	NaN	345.459	326.767	310.277	286.139	275.901	271.163	273.532	0.837085	2.31255	2.30209	2.32415	2.32415
10	P010_Cell01M	84	'Female'	27.4167	14	13.4167	120	'Tumor'	'Right'	893	15.6788	85	0.384227	NaN	NaN	NaN	NaN	NaN	NaN	NaN	NaN	2.31255	2.30209	2.32415	2.32415	426.37	17.0927
10	P010_Cell01N	84	'Female'	27.4167	14	13.4167	120	'Tumor'	'Right'	NaN	NaN	NaN	NaN	385.742	381.241	355.835	345.288	344.238	354.614	349.426	0.91655	2.31255	2.30209	2.32415	2.32415
10	P010_Cell02	84	'Female'	27.4167	14	13.4167	120	'Tumor'	'Right'	NaN	NaN	NaN	NaN	379.639	386.475	347.666	343.458	342.407	327.148	334.778	0.866235	2.31255	2.30209	2.32415	2.32415
10	P010_Cell02M	84	'Female'	27.4167	14	13.4167	120	'Tumor'	'Right'	1046	16.1213	71	0.450058	NaN	NaN	NaN	NaN	NaN	NaN	NaN	NaN	2.31255	2.30209	2.32415	2.32415
10	P010_Cell03	84	'Female'	27.4167	14	13.4167	120	'Tumor'	'Right'	NaN	NaN	NaN	NaN	359.802	360.064	318.756	314.827	309.569	287.992	298.78	0.829798	2.31255	2.30209	2.32415	2.32415
10	P010_Cell03N	84	'Female'	27.4167	14	13.4167	120	'Tumor'	'Right'	NaN	NaN	NaN	NaN	535.278	517.171	498.047	475.952	475.202	457.153	466.178	0.901399	2.31255	2.30209	2.32415	2.32415
10	P010_Cell03M	84	'Female'	27.4167	14	13.4167	120	'Tumor'	'Right'	1165	22.4415	107	0.501259	NaN	NaN	NaN	NaN	NaN	NaN	NaN	NaN	2.31255	2.30209	2.32415	2.32415
10	P010_Cell04	84	'Female'	27.4167	14	13.4167	120	'Tumor'	'Right'	893	11.4604	53	0.384227	254.517	266.2	249.023	243.683	228.908	202.451	215.68	0.810215	2.31255	2.30209	2.32415	2.32415	204.133	18.7247
10	P010_Cell04N	84	'Female'	27.4167	14	13.4167	120	'Tumor'	'Right'	NaN	NaN	NaN	NaN	405.273	399.431	361.938	350.085	336.66	320.74	328.7	0.822919	2.31255	2.30209	2.32415	2.32415
10	P010_Cell05	84	'Female'	27.4167	14	13.4167	120	'Tumor'	'Right'	1056	16.9699	75	0.454361	332.642	345.067	343.704	338.658	326.889	301.559	314.224	0.910618	2.31255	2.30209	2.32415	2.32415	199.526	12.876
10	P010_Cell06	84	'Female'	27.4167	14	13.4167	120	'Tumor'	'Right'	1094	13.3108	56	0.470711	363.464	385.786	396.118	362.331	350.5	338.912	344.706	0.893516	2.31255	2.30209	2.32415	2.32415
10	P010_Cell13	84	'Female'	27.4167	14	13.4167	120	'Tumor'	'Right'	1192	14.3915	60	0.512877	NaN	NaN	NaN	NaN	NaN	NaN	NaN	NaN	2.31255	2.30209	2.32415	2.32415	218.653	16.7744
11	P011_Cell01M	110	'Male'	40.6667	10.3333	30.3333	30	'Tumor'	'Right'	575	11.4872	52	0.233058	NaN	NaN	NaN	NaN	NaN	NaN	NaN	NaN	2.47616	2.48432	2.4672	2.4672	223.741	21.7
11	P011_Cell02M	110	'Male'	40.6667	10.3333	30.3333	30	'Tumor'	'Right'	861	16.5138	70	0.348979	NaN	NaN	NaN	NaN	NaN	NaN	NaN	NaN	2.47616	2.48432	2.4672	2.4672	323.53	26.422
11	P011_Cell13	110	'Male'	40.6667	10.3333	30.3333	30	'Tumor'	'Right'	NaN	NaN	NaN	NaN	384.521	324.951	340.271	327.561	312.354	285.351	298.852	0.919684	2.47616	2.48432	2.4672	2.4672	301.895	21.8164
12	P011_Cell04	87	'Male'	17.75	0.916667	16.8333	150	'MTS'	'Right'	NaN	NaN	NaN	NaN	221.558	215.541	199.051	183.323	171.862	159.487	165.675	0.768644	NaN	NaN	NaN	NaN	223.741	15.2193
12	P011_Cell06	87	'Male'	17.75	0.916667	16.8333	150	'MTS'	'Right'	NaN	NaN	NaN	NaN	364.99	350.304	316.337	299.508	277.924	228.863	253.394	0.723354	NaN	NaN	NaN	NaN	346.541	15.5644
12	P011_Cell08	87	'Male'	17.75	0.916667	16.8333	150	'MTS'	'Right'	NaN	NaN	NaN	NaN	266.113	252.652	213.776	197.835	194.145	175.71	184.927	0.731946	NaN	NaN	NaN	NaN	338.678	20.3745
12	P011_Cell08N	87	'Male'	17.75	0.916667	16.8333	150	'MTS'	'Right'	NaN	NaN	NaN	NaN	268.86	258.92	227.127	220.52	211.519	198.227	204.873	0.791261	NaN	NaN	NaN	NaN
13	P013_Cell01M	67	'Female'	22.9167	15	7.91667	9.083	'MTS'	'Left'	520	11.2237	56	0.208385	NaN	NaN	NaN	NaN	NaN	NaN	NaN	NaN	2.52862	2.49538	2.55971	2.49538
14	P014_Cell03	72	'Male'	52.75	5.75	47	9.5	'MTS'	'Left'	920	11.7228	63	0.424389	NaN	NaN	NaN	NaN	NaN	NaN	NaN	NaN	2.21249	2.16782	2.25285	2.16782
14	P014_Cell05	72	'Male'	52.75	5.75	47	9.5	'MTS'	'Left'	820	11.7788	54	0.37826	NaN	NaN	NaN	NaN	NaN	NaN	NaN	NaN	2.21249	2.16782	2.25285	2.16782
15	'none'	97	'Male'	24.75	18.5833	6.16667	NaN	'Tumor'	'Left'	NaN	NaN	NaN	NaN	NaN	NaN	NaN	NaN	NaN	NaN	NaN	NaN	2.35273	2.36113	2.3437	2.36113
16	P016_Cell01M	104	'Male'	19.0833	16.9167	2.16667	450	'Other'	'Right'	1307	14.6532	51	NaN	NaN	NaN	NaN	NaN	NaN	NaN	NaN	NaN	NaN	NaN	NaN	NaN	256.989	15.5157
17	'none'	88	'Female'	48.25	46.5	1.75	60	'Other'	'Right'	NaN	NaN	NaN	NaN	NaN	NaN	NaN	NaN	NaN	NaN	NaN	NaN	2.47026	2.4294	2.51038	2.51038	256.989	14.7469
18	'none'	65	'Female'	38.75	16.4167	22.3333	360	'MTS'	'Right'	NaN	NaN	NaN	NaN	NaN	NaN	NaN	NaN	NaN	NaN	NaN	NaN	2.35376	2.31249	2.39376	2.39376	275.268	13.1078
19	P019_Cell03	62	'Female'	40.1667	23.5	16.6667	NaN	'Other'	'Right'	1063	14.5383	58	0.441005	317.535	NaN	NaN	NaN	NaN	NaN	NaN	NaN	2.44652	2.48241	2.4104	2.4104
20	'none'	84.5	'Female'	31.0833	7.33333	23.75	nan	'Other'	'Left'	NaN	NaN	NaN	NaN	NaN	NaN	NaN	NaN	NaN	NaN	NaN	NaN	2.58125	2.59228	2.57047	2.59228	281.674	10.5934
21	P021_Cell01M	88	'Female'	34.8333	1.08333	33.75	NaN	'Other'	'Left'	945	14.2618	70	0.390231	NaN	NaN	NaN	NaN	NaN	NaN	NaN	NaN	2.51121	2.42165	2.5998	2.42165	316.228	16.2372
22	P022_Cell01M	77	'Male'	54.1667	45.1667	9	30	'Tumor'	'Left'	525	6.45413	27	NaN	NaN	NaN	NaN	NaN	NaN	NaN	NaN	NaN	NaN	NaN	NaN	NaN	275.268	18.1145
23	P023_Cell01	91	'Male'	24.8333	8.83333	16	1.67	'Other'	'Left'	1014	14.4502	56	0.40804	NaN	NaN	NaN	NaN	NaN	NaN	NaN	NaN	2.5299	2.48505	2.5757	2.48505	269.022	15.622
23	P023_Cell02	91	'Male'	24.8333	8.83333	16	1.67	'Other'	'Left'	1067	18.038	79	0.429368	NaN	NaN	NaN	NaN	NaN	NaN	NaN	NaN	2.5299	2.48505	2.5757	2.48505	371.363	23.2171
24	P024_Cell01	70	'Female'	31.25	21.1667	10.0833	4	'MTS'	'Right'	1113	14.3582	63	0.455671	345.886	367.592	335.656	312.047	297.144	316.432	306.788	0.834589	2.38931	2.33042	2.44255	2.44255	294.985	26.4384
24	P024_Cell02	70	'Female'	31.25	21.1667	10.0833	4	'MTS'	'Right'	NaN	NaN	NaN	NaN	251.099	250.541	215.27	186.586	172.566	223.877	198.221	0.791174	2.38931	2.33042	2.44255	2.44255
24	P024_Cell05	70	'Female'	31.25	21.1667	10.0833	4	'MTS'	'Right'	NaN	NaN	NaN	NaN	255.188	NaN	189.512	212.158	203.575	NaN	203.575	#VALUE!	2.38931	2.33042	2.44255	2.44255
25	P025_Cell01M	114	'Male'	49.1667	8.08333	41.0833	2	'Other'	'Left'	1396	9.87843	43	0.549389	NaN	NaN	NaN	NaN	NaN	NaN	NaN	NaN	2.59835	2.54101	2.65301	2.54101
25	P025_Cell03	114	'Male'	49.1667	8.08333	41.0833	2	'Other'	'Left'	1067	16.0272	69	0.419912	NaN	NaN	NaN	NaN	NaN	NaN	NaN	#VALUE!	2.59835	2.54101	2.65301	2.54101	275.268	26.0757
25	P025_Cell06	114	'Male'	49.1667	8.08333	41.0833	2	'Other'	'Left'	1182	16.057	67	0.46517	341.614	346.601	297.196	267.894	268.841	296.622	282.731	0.815725	2.59835	2.54101	2.65301	2.54101	262.931	27.8982
25	P025_Cell07	114	'Male'	49.1667	8.08333	41.0833	2	'Other'	'Left'	NaN	NaN	NaN	NaN	320.618	308.69	263.489	240.51	211.036	176.662	193.849	0.627973	2.59835	2.54101	2.65301	2.54101
25	P025_Cell08	114	'Male'	49.1667	8.08333	41.0833	2	'Other'	'Left'	NaN	NaN	NaN	NaN	353.821	385.986	333.047	310.543	331.07	337.646	334.358	0.866244	2.59835	2.54101	2.65301	2.54101
26	P026_Cell01M	83	'Male'	25.4167	23.5	1.91667	NaN	'Tumor'	'Left'	782	12.0372	49	0.269987	NaN	NaN	NaN	NaN	NaN	NaN	NaN	NaN	2.92304	2.89644	2.95172	2.89644	223.741	19.9377
26	P026_Cell02	83	'Male'	25.4167	23.5	1.91667	NaN	'Tumor'	'Left'	NaN	NaN	NaN	NaN	342.896	320.138	285.411	259.504	276.716	293.03	284.873	0.889844	2.92304	2.89644	2.95172	2.89644
26	P026_Cell02M	83	'Male'	25.4167	23.5	1.91667	NaN	'Tumor'	'Left'	789	16.8636	69	0.272404	NaN	NaN	NaN	NaN	NaN	NaN	NaN	NaN	2.92304	2.89644	2.95172	2.89644	294.985	26.4479
26	P026_Cell03M	83	'Male'	25.4167	23.5	1.91667	NaN	'Tumor'	'Left'	876	14.5478	56	0.302441	NaN	NaN	NaN	NaN	NaN	NaN	NaN	NaN	2.92304	2.89644	2.95172	2.89644	281.674	26.154
26	P026_Cell04M	83	'Male'	25.4167	23.5	1.91667	NaN	'Tumor'	'Left'	988	20.7425	92	0.341109	NaN	NaN	NaN	NaN	NaN	NaN	NaN	NaN	2.92304	2.89644	2.95172	2.89644	262.931	29.4578
26	P026_Cell05M	83	'Male'	25.4167	23.5	1.91667	NaN	'Tumor'	'Left'	1125	20.633	94	0.388408	NaN	NaN	NaN	NaN	NaN	NaN	NaN	NaN	2.92304	2.89644	2.95172	2.89644	436.269	30.4732
26	P026_Cell06M	83	'Male'	25.4167	23.5	1.91667	NaN	'Tumor'	'Left'	1202	14.0681	50	0.414993	NaN	NaN	NaN	NaN	NaN	NaN	NaN	NaN	2.92304	2.89644	2.95172	2.89644	323.53	24.2765
27	P027_Cell01	109	'Female'	44.9167	22.75	22.1667	3	'Other'	'Right'	1148	14.3604	61	0.473709	NaN	NaN	NaN	NaN	NaN	NaN	NaN	NaN	2.3508	2.28121	2.42343	2.42343	281.674	26.8851
27	P027_Cell01M	109	'Female'	44.9167	22.75	22.1667	3	'Other'	'Right'	675	15.3011	75	0.278531	NaN	NaN	NaN	NaN	NaN	NaN	NaN	NaN	2.3508	2.28121	2.42343	2.42343	245.428	29.3136
27	P027_Cell02	109	'Female'	44.9167	22.75	22.1667	3	'Other'	'Right'	NaN	NaN	NaN	NaN	535.522	491.778	440.058	419.641	437.169	469.34	453.254	0.921665	2.3508	2.28121	2.42343	2.42343
27	P027_Cell02M	109	'Female'	44.9167	22.75	22.1667	3	'Other'	'Right'	790	9.20553	46	0.325984	NaN	NaN	NaN	NaN	NaN	NaN	NaN	NaN	2.3508	2.28121	2.42343	2.42343	218.653	12.8022
27	P027_Cell03M	109	'Female'	44.9167	22.75	22.1667	3	'Other'	'Right'	945	17.6393	73	0.389943	NaN	NaN	NaN	NaN	NaN	NaN	NaN	NaN	2.3508	2.28121	2.42343	2.42343	288.245	30.1936
27	P027_Cell04M	109	'Female'	44.9167	22.75	22.1667	3	'Other'	'Right'	965	16.3894	78	0.398196	NaN	NaN	NaN	NaN	NaN	NaN	NaN	NaN	2.3508	2.28121	2.42343	2.42343	194.95	15.9153
27	P027_Cell05M	109	'Female'	44.9167	22.75	22.1667	3	'Other'	'Right'	991	13.0895	51	0.408925	NaN	NaN	NaN	NaN	NaN	NaN	NaN	NaN	2.3508	2.28121	2.42343	2.42343	234.315	11.0374
27	P027_Cell06M	109	'Female'	44.9167	22.75	22.1667	3	'Other'	'Right'	1072	12.5882	52	0.442348	NaN	NaN	NaN	NaN	NaN	NaN	NaN	NaN	2.3508	2.28121	2.42343	2.42343	194.95	16.5858
27	P027_Cell07M	109	'Female'	44.9167	22.75	22.1667	3	'Other'	'Right'	1204	18.8445	84	0.496816	NaN	NaN	NaN	NaN	NaN	NaN	NaN	NaN	2.3508	2.28121	2.42343	2.42343	251.189	29.7053
27	P027_Cell08M	109	'Female'	44.9167	22.75	22.1667	3	'Other'	'Right'	1277	20.0343	87	0.526939	NaN	NaN	NaN	NaN	NaN	NaN	NaN	NaN	2.3508	2.28121	2.42343	2.42343
27	P027_Cell09M	109	'Female'	44.9167	22.75	22.1667	3	'Other'	'Right'	925	20.0174	84	0.38169	NaN	NaN	NaN	NaN	NaN	NaN	NaN	NaN	2.3508	2.28121	2.42343	2.42343	269.022	26.5861
28	P028_Cell01M	102	'Female'	47	25.8333	21.1667	8	'Tumor'	'Right'	1502	17.8497	75	0.563049	NaN	NaN	NaN	NaN	NaN	NaN	NaN	NaN	2.60274	2.53866	2.66762	2.66762
28	P028_Cell02M	102	'Female'	47	25.8333	21.1667	8	'Tumor'	'Right'	1023	21.5056	82	0.383488	NaN	NaN	NaN	NaN	NaN	NaN	NaN	NaN	2.60274	2.53866	2.66762	2.66762	204.133	18.1486
30	P030_Cell04	97	'Male'	38.4167	28.0833	10.3333	6	'MTS'	'Right'	NaN	NaN	NaN	NaN	334.045	332.68	275.553	268.494	275.818	252.991	264.404	0.794771	NaN	NaN	NaN	NaN
30	P030_Cell05	97	'Male'	38.4167	28.0833	10.3333	6	'MTS'	'Right'	NaN	NaN	NaN	NaN	370.911	380.997	366.17	317.713	287.616	247.203	267.409	0.701868	NaN	NaN	NaN	NaN
31	P031_Cell01	79	'Female'	40.3333	33.9167	6.41667	210	'MTS'	'Right'	NaN	NaN	NaN	NaN	436.768	419.264	385.616	359.71	360.021	342.529	351.275	0.837837	2.57003	2.5818	2.55779	2.55779
31	P031_Cell10	79	'Female'	40.3333	33.9167	6.41667	210	'MTS'	'Right'	NaN	NaN	NaN	NaN	322.571	324.056	292.908	NaN	287.201	NaN	287.201	0.886269	2.57003	2.5818	2.55779	2.55779
32	P032_Cell03	117	'Male'	43.75	35	8.75	4	'Other'	'Left'	NaN	NaN	NaN	NaN	503.784	499.294	470.983	425.112	362.573	349.669	356.121	0.713249	2.4749	2.40921	2.53944	2.40921
32	P032_Cell05	117	'Male'	43.75	35	8.75	4	'Other'	'Left'	NaN	NaN	NaN	NaN	409.485	416.861	400.719	384.983	353.21	425.781	389.496	0.934353	2.4749	2.40921	2.53944	2.40921
32	P032_Cell06	117	'Male'	43.75	35	8.75	4	'Other'	'Left'	NaN	NaN	NaN	NaN	488.464	431.452	444.324	407.39	375.028	370.457	372.743	0.863926	2.4749	2.40921	2.53944	2.40921
33	P033_Cell01M	99	'Female'	29.5833	2	27.5833	8.5	'Tumor'	'Left'	749	13.1388	62	0.280172	NaN	NaN	NaN	NaN	NaN	NaN	NaN	NaN	2.68052	2.67335	2.68931	2.67335	204.133	17.2225
34	P034_Cell01	72	'Male'	43.5833	4	39.5833	8	'MTS'	'Left'	NaN	NaN	NaN	NaN	358.948	405.596	351.883	310.008	310.004	317.147	313.575	0.773122	2.38931	2.33042	2.44255	2.33042
34	P034_Cell01M	72	'Male'	43.5833	4	39.5833	8	'MTS'	'Left'	409	8.36521	45	0.175505	NaN	NaN	NaN	NaN	NaN	NaN	NaN	NaN	2.38931	2.33042	2.44255	2.33042	208.853	16.8674
34	P034_Cell05	72	'Male'	43.5833	4	39.5833	8	'MTS'	'Left'	643	14.7145	66	0.275916	552.368	550.82	489.353	464.871	NaN	NaN	NaN	NaN	2.38931	2.33042	2.44255	2.33042	223.741	21.3563
34	P034_Cell06	72	'Male'	43.5833	4	39.5833	8	'MTS'	'Left'	471	12.1065	64	0.20211	478.058	484.187	421.085	413.081	NaN	NaN	NaN	NaN	2.38931	2.33042	2.44255	2.33042	228.961	20.6433
34	P034_Cell07	72	'Male'	43.5833	4	39.5833	8	'MTS'	'Left'	NaN	NaN	NaN	NaN	389.709	382.429	313.624	253.443	197.556	190.048	193.802	0.506767	2.38931	2.33042	2.44255	2.33042
35	P036_Cell01	82	'Female'	40.5	7.91667	32.5833	8.6	'Other'	'Right'	NaN	NaN	NaN	NaN	536.499	520.02	455.039	396.797	373.65	411.438	392.544	0.754864	2.40827	2.49983	2.2952	2.2952
35	P036_Cell02	82	'Female'	40.5	7.91667	32.5833	8.6	'Other'	'Right'	NaN	NaN	NaN	NaN	457.153	460.728	411.938	365.638	322.841	336.123	329.482	0.715134	2.40827	2.49983	2.2952	2.2952
35	P036_Cell03	82	'Female'	40.5	7.91667	32.5833	8.6	'Other'	'Right'	NaN	NaN	NaN	NaN	330.811	340.358	284.846	241.182	215.821	255.356	235.588	0.692177	2.40827	2.49983	2.2952	2.2952
35	P036_Cell04	82	'Female'	40.5	7.91667	32.5833	8.6	'Other'	'Right'	NaN	NaN	NaN	NaN	407.105	409.197	355.585	317.37	329.895	340.068	334.981	0.818631	2.40827	2.49983	2.2952	2.2952
35	P036_Cell05	82	'Female'	40.5	7.91667	32.5833	8.6	'Other'	'Right'	NaN	NaN	NaN	NaN	535.584	527.78	483.475	444.994	448.561	482.992	465.776	0.88252	2.40827	2.49983	2.2952	2.2952
35	P036_Cell06	82	'Female'	40.5	7.91667	32.5833	8.6	'Other'	'Right'	NaN	NaN	NaN	NaN	401.917	403.835	357.056	331.321	304.631	267.435	286.033	0.708292	2.40827	2.49983	2.2952	2.2952
36	P037_Cell02	95	'Male'	29.1667	22.5833	6.58333	30	'Other'	'Right'	NaN	NaN	NaN	NaN	256.348	264.151	195.46	168.613	180.359	167.847	174.103	0.659102	2.84826	2.82178	2.87645	2.87645
36	P037_Cell03	95	'Male'	29.1667	22.5833	6.58333	30	'Other'	'Right'	NaN	NaN	NaN	NaN	340.271	333.099	274.526	258.377	266.266	NaN	266.266	0.799359	2.84826	2.82178	2.87645	2.87645
36	P037_Cell05	95	'Male'	29.1667	22.5833	6.58333	30	'Other'	'Right'	NaN	NaN	NaN	NaN	466.614	472.761	394.325	343.398	307.017	355.263	331.14	0.700439	2.84826	2.82178	2.87645	2.87645
36	P037_Cell06	95	'Male'	29.1667	22.5833	6.58333	30	'Other'	'Right'	NaN	NaN	NaN	NaN	419.006	411.797	344.296	312.503	354.462	375.671	365.067	0.886522	2.84826	2.82178	2.87645	2.87645
37	P038_Cell02	91	'Female'	20.3333	3.66667	16.6667	2	'Other'	'Right'	NaN	NaN	NaN	NaN	407.715	405.186	342.294	292.605	269.476	301.385	285.43	0.704442	NaN	NaN	NaN	NaN
37	P038_Cell03	91	'Female'	20.3333	3.66667	16.6667	2	'Other'	'Right'	NaN	NaN	NaN	NaN	388.184	373.143	252.088	208.314	253.067	262.96	258.013	0.69146	NaN	NaN	NaN	NaN
37	P038_Cell04	91	'Female'	20.3333	3.66667	16.6667	2	'Other'	'Right'	NaN	NaN	NaN	NaN	314.941	321.045	221.73	154.795	108.032	126.546	117.289	0.365336	NaN	NaN	NaN	NaN
37	P038_Cell05	91	'Female'	20.3333	3.66667	16.6667	2	'Other'	'Right'	NaN	NaN	NaN	NaN	322.266	313.982	235.203	180.832	139.769	180.52	160.145	0.510044	NaN	NaN	NaN	NaN
37	P038_Cell06	91	'Female'	20.3333	3.66667	16.6667	2	'Other'	'Right'	NaN	NaN	NaN	NaN	398.865	394.985	279.072	189.086	140.801	216.957	178.879	0.452875	NaN	NaN	NaN	NaN
38	P039_Cell01	82	'Male'	21.1667	7.91667	13.25	12.5	'Tumor'	'Left'	NaN	NaN	NaN	NaN	307.617	304.914	252.647	202.338	185.471	199.107	192.289	0.630632	2.55535	2.55527	2.55542	2.55527
38	P039_Cell02	82	'Male'	21.1667	7.91667	13.25	12.5	'Tumor'	'Left'	NaN	NaN	NaN	NaN	265.198	265.765	199.947	185.799	136.98	144.388	140.684	0.529355	2.55535	2.55527	2.55542	2.55527
38	P039_Cell03	82	'Male'	21.1667	7.91667	13.25	12.5	'Tumor'	'Left'	NaN	NaN	NaN	NaN	243.225	239.607	148.51	86.7899	106.862	152.054	129.458	0.540294	2.55535	2.55527	2.55542	2.55527
38	P039_Cell04	82	'Male'	21.1667	7.91667	13.25	12.5	'Tumor'	'Left'	NaN	NaN	NaN	NaN	225.525	230.233	154.614	119.937	153.605	126.038	139.821	0.607303	2.55535	2.55527	2.55542	2.55527
38	P039_Cell05	82	'Male'	21.1667	7.91667	13.25	12.5	'Tumor'	'Left'	NaN	NaN	NaN	NaN	268.86	267.436	207.094	186.768	222.473	213.318	217.896	0.814758	2.55535	2.55527	2.55542	2.55527
38	P039_Cell06	82	'Male'	21.1667	7.91667	13.25	12.5	'Tumor'	'Left'	NaN	NaN	NaN	NaN	478.21	472.031	399.259	363.974	353.088	NaN	353.088	0.74802	2.55535	2.55527	2.55542	2.55527
39	P040_Cell01	115	'Male'	39.5833	19.75	19.8333	40	'MTS'	'Left'	NaN	NaN	NaN	NaN	618.286	613.621	524.925	461.119	480.194	494.385	487.289	0.794121	NaN	NaN	NaN	NaN
40	P041_Cell01	97	'Female'	48.3333	14	34.3333	15	'MTS'	'Right'	NaN	NaN	NaN	NaN	414.124	414.036	327.619	295.77	258.475	276.984	267.73	0.646633	2.30452	2.30008	2.30936	2.30936
40	P041_Cell03	97	'Female'	48.3333	14	34.3333	15	'MTS'	'Right'	NaN	NaN	NaN	NaN	408.02	430.211	309.567	266.28	273.058	263.519	268.289	0.623621	2.30452	2.30008	2.30936	2.30936
40	P041_Cell05	97	'Female'	48.3333	14	34.3333	15	'MTS'	'Right'	NaN	NaN	NaN	NaN	418.091	415.737	324.379	282.465	242.05	254.436	248.243	0.597115	2.30452	2.30008	2.30936	2.30936
40	P041_Cell06	97	'Female'	48.3333	14	34.3333	15	'MTS'	'Right'	NaN	NaN	NaN	NaN	372.62	375.017	308.511	264.202	236.689	252.321	244.505	0.651984	2.30452	2.30008	2.30936	2.30936
40	P041_Cell07	97	'Female'	48.3333	14	34.3333	15	'MTS'	'Right'	NaN	NaN	NaN	NaN	419.617	417.514	351.96	310.956	337.28	339.699	338.49	0.810725	2.30452	2.30008	2.30936	2.30936
40	P041_Cell09	97	'Female'	48.3333	14	34.3333	15	'MTS'	'Right'	NaN	NaN	NaN	NaN	487.671	472.412	408.783	352.375	334.537	356.338	345.437	0.73122	2.30452	2.30008	2.30936	2.30936
41	P042_Cell01	94	'Female'	39.75	16	23.75	2.2	'MTS'	'Right'	NaN	NaN	NaN	NaN	441.284	452.576	386.189	356.278	373.688	395.203	384.445	0.849461	NaN	NaN	NaN	NaN
41	P042_Cell02	94	'Female'	39.75	16	23.75	2.2	'MTS'	'Right'	NaN	NaN	NaN	NaN	472.412	477.295	403.632	367.091	346.378	368.313	357.346	0.748689	NaN	NaN	NaN	NaN
41	P042_Cell03	94	'Female'	39.75	16	23.75	2.2	'MTS'	'Right'	NaN	NaN	NaN	NaN	359.192	365.601	300.415	272.496	230.768	237.623	234.196	0.640578	NaN	NaN	NaN	NaN
41	P042_Cell04	94	'Female'	39.75	16	23.75	2.2	'MTS'	'Right'	NaN	NaN	NaN	NaN	444.946	440.63	348.321	289.777	312.347	329.285	320.816	0.728084	NaN	NaN	NaN	NaN
41	P042_Cell05	94	'Female'	39.75	16	23.75	2.2	'MTS'	'Right'	NaN	NaN	NaN	NaN	386.047	395.944	319.982	301.16	315.857	334.167	325.012	0.820854	NaN	NaN	NaN	NaN
41	P042_Cell06	94	'Female'	39.75	16	23.75	2.2	'MTS'	'Right'	NaN	NaN	NaN	NaN	396.423	407.54	350.037	325.472	368.652	367.432	368.042	0.903081	NaN	NaN	NaN	NaN
41	P042_Cell07	94	'Female'	39.75	16	23.75	2.2	'MTS'	'Right'	NaN	NaN	NaN	NaN	561.523	528.652	474.273	417.409	399.771	424.805	412.288	0.779886	NaN	NaN	NaN	NaN
41	P042_Cell08	94	'Female'	39.75	16	23.75	2.2	'MTS'	'Right'	NaN	NaN	NaN	NaN	394.897	412.075	348.816	306.376	245.518	269.235	257.377	0.624588	NaN	NaN	NaN	NaN
42	P043_Cell01	81	'Male'	43.5	23	20.5	4.3	'MTS'	'Right'	NaN	NaN	NaN	NaN	504.883	496.416	420.747	378.527	343.474	317.563	330.519	0.66581	2.62986	2.64538	2.61376	2.61376
42	P043_Cell01N	81	'Male'	43.5	23	20.5	4.3	'MTS'	'Right'	NaN	NaN	NaN	NaN	419.434	416.275	355.02	329.25	328.038	351.538	339.788	0.816259	2.62986	2.64538	2.61376	2.61376
42	P043_Cell02N	81	'Male'	43.5	23	20.5	4.3	'MTS'	'Right'	NaN	NaN	NaN	NaN	415.1	454.094	424.217	401.723	393.004	398.773	395.889	0.871821	2.62986	2.64538	2.61376	2.61376
42	P043_Cell03N	81	'Male'	43.5	23	20.5	4.3	'MTS'	'Right'	NaN	NaN	NaN	NaN	192.871	189.341	178.131	172.31	186.401	176.758	181.58	0.959007	2.62986	2.64538	2.61376	2.61376
42	P043_Cell04	81	'Male'	43.5	23	20.5	4.3	'MTS'	'Right'	NaN	NaN	NaN	NaN	440.369	448.456	391.369	363.535	334.407	346.767	340.587	0.759466	2.62986	2.64538	2.61376	2.61376
42	P043_Cell04N	81	'Male'	43.5	23	20.5	4.3	'MTS'	'Right'	NaN	NaN	NaN	NaN	380.493	400.627	373.889	352.413	347.859	364.197	356.028	0.888676	2.62986	2.64538	2.61376	2.61376
42	P043_Cell05	81	'Male'	43.5	23	20.5	4.3	'MTS'	'Right'	NaN	NaN	NaN	NaN	463.562	485.447	416.967	375.297	367.063	387.699	377.381	0.777388	2.62986	2.64538	2.61376	2.61376
42	P043_Cell06	81	'Male'	43.5	23	20.5	4.3	'MTS'	'Right'	NaN	NaN	NaN	NaN	600.586	589.818	527.469	477.405	433.672	420.596	427.134	0.72418	2.62986	2.64538	2.61376	2.61376
42	P043_Cell07	81	'Male'	43.5	23	20.5	4.3	'MTS'	'Right'	NaN	NaN	NaN	NaN	526.428	514.352	446.167	397.694	395.714	397.644	396.679	0.771221	2.62986	2.64538	2.61376	2.61376
42	P043_Cell08	81	'Male'	43.5	23	20.5	4.3	'MTS'	'Right'	NaN	NaN	NaN	NaN	356.14	359.235	293.417	266.677	289.743	300.72	295.231	0.821833	2.62986	2.64538	2.61376	2.61376
42	P043_Cell09	81	'Male'	43.5	23	20.5	4.3	'MTS'	'Right'	NaN	NaN	NaN	NaN	500.793	488.586	421.332	378.305	394.226	396.881	395.554	0.809588	2.62986	2.64538	2.61376	2.61376
43	P044_Cell01N	70	'Female'	32.5	18.4167	14.0833	16	'MTS'	'Right'	NaN	NaN	NaN	NaN	336.304	331.595	NaN	254.902	220.37	144.352	182.361	0.549951	NaN	NaN	NaN	NaN
43	P044_Cell02N	70	'Female'	32.5	18.4167	14.0833	16	'MTS'	'Right'	NaN	NaN	NaN	NaN	391.235	379.29	347.726	326.399	309.429	299.568	304.499	0.802813	NaN	NaN	NaN	NaN
44	P044_Cell03N	82	'Male'	51.4167	37.25	14.1667	3	'Other'	'Right'	NaN	NaN	NaN	NaN	272.522	266.942	235.247	214.272	194.875	174.831	184.853	0.692485	2.41366	2.35085	2.47601	2.47601
44	P045_Cell01	82	'Male'	51.4167	37.25	14.1667	3	'Other'	'Right'	NaN	NaN	NaN	NaN	499.573	504.804	449.92	423.56	364.356	367.082	365.719	0.724477	2.41366	2.35085	2.47601	2.47601
45	P046_Cell01	114	'Female'	17.9167	5	12.9167	17.2	'Tumor'	'Right'	NaN	NaN	NaN	NaN	NaN	NaN	NaN	NaN	NaN	NaN	NaN	NaN	3.00137	2.88545	3.09442	3.09442
45	P046_Cell02	114	'Female'	17.9167	5	12.9167	17.2	'Tumor'	'Right'	NaN	NaN	NaN	NaN	NaN	NaN	NaN	NaN	NaN	NaN	NaN	NaN	3.00137	2.88545	3.09442	3.09442
45	P046_Cell02N	114	'Female'	17.9167	5	12.9167	17.2	'Tumor'	'Right'	626	14.1483	65	0.2023	331.421	332.692	274.556	276.489	262.451	NaN	262.451	0.78887	3.00137	2.88545	3.09442	3.09442
45	P046_Cell03	114	'Female'	17.9167	5	12.9167	17.2	'Tumor'	'Right'	NaN	NaN	NaN	NaN	NaN	NaN	NaN	NaN	NaN	NaN	NaN	NaN	3.00137	2.88545	3.09442	3.09442
45	P046_Cell03N	114	'Female'	17.9167	5	12.9167	17.2	'Tumor'	'Right'	685	13.5815	66	0.221367	NaN	NaN	NaN	NaN	NaN	NaN	NaN	NaN	3.00137	2.88545	3.09442	3.09442
45	P046_Cell04	114	'Female'	17.9167	5	12.9167	17.2	'Tumor'	'Right'	NaN	NaN	NaN	NaN	NaN	NaN	NaN	NaN	NaN	NaN	NaN	NaN	3.00137	2.88545	3.09442	3.09442
45	P046_Cell04N	114	'Female'	17.9167	5	12.9167	17.2	'Tumor'	'Right'	NaN	NaN	NaN	NaN	276.184	281.525	205.994	206.726	200.272	181.58	190.926	0.678184	3.00137	2.88545	3.09442	3.09442
45	P046_Cell05	114	'Female'	17.9167	5	12.9167	17.2	'Tumor'	'Right'	NaN	NaN	NaN	NaN	NaN	NaN	NaN	NaN	NaN	NaN	NaN	NaN	3.00137	2.88545	3.09442	3.09442
45	P046_Cell05N	114	'Female'	17.9167	5	12.9167	17.2	'Tumor'	'Right'	NaN	NaN	NaN	NaN	289.612	293.477	241.638	247.253	252.38	234.07	243.225	0.828769	3.00137	2.88545	3.09442	3.09442
45	P046_Cell06	114	'Female'	17.9167	5	12.9167	17.2	'Tumor'	'Right'	NaN	NaN	NaN	NaN	NaN	NaN	NaN	NaN	NaN	NaN	NaN	NaN	3.00137	2.88545	3.09442	3.09442
45	P046_Cell06N	114	'Female'	17.9167	5	12.9167	17.2	'Tumor'	'Right'	NaN	NaN	NaN	NaN	212.097	210.789	178.769	179.545	177.765	163.269	170.517	0.808945	3.00137	2.88545	3.09442	3.09442
45	P046_Cell07N	114	'Female'	17.9167	5	12.9167	17.2	'Tumor'	'Right'	619	13.7549	74	0.200038	312.5	307.617	261.754	223.872	212.25	175.781	194.016	0.630704	3.00137	2.88545	3.09442	3.09442
45	P046_Cell08N	114	'Female'	17.9167	5	12.9167	17.2	'Tumor'	'Right'	NaN	NaN	NaN	NaN	267.029	264.282	202.026	201.721	181.58	163.269	172.424	0.652425	3.00137	2.88545	3.09442	3.09442
45	P046_Cell09N	114	'Female'	17.9167	5	12.9167	17.2	'Tumor'	'Right'	NaN	NaN	NaN	NaN	247.192	245.327	193.448	206.909	NaN	184.631	184.631	0.752592	3.00137	2.88545	3.09442	3.09442
46	P047_Cell01N	90	'Male'	22.6667	11	11.6667	23	'Other'	'Right'	640	11.3971	58	NaN	344.849	340.271	272.811	254.6	201.763	201.416	201.589	0.592438	NaN	NaN	NaN	NaN
46	P047_Cell02N	90	'Male'	22.6667	11	11.6667	23	'Other'	'Right'	592	4.58104	29	NaN	NaN	NaN	NaN	NaN	NaN	NaN	NaN	NaN	NaN	NaN	NaN	NaN
46	P047_Cell03N	90	'Male'	22.6667	11	11.6667	23	'Other'	'Right'	687	10.368	49	NaN	279.236	267.198	225.612	193.317	182.597	152.969	167.783	0.627935	NaN	NaN	NaN	NaN
46	P047_Cell04N	90	'Male'	22.6667	11	11.6667	23	'Other'	'Right'	637	10.5069	48	NaN	NaN	NaN	NaN	NaN	NaN	NaN	NaN	NaN	NaN	NaN	NaN	NaN
											#NAME?	#NAME?
											#NAME?	#NAME?
