# Supplementary figures and images for: Large and fast human pyramidal neurons associate with intelligence
Source: eLife journal article supplement (doi:10.7554/elife.41714), 2018-12-18

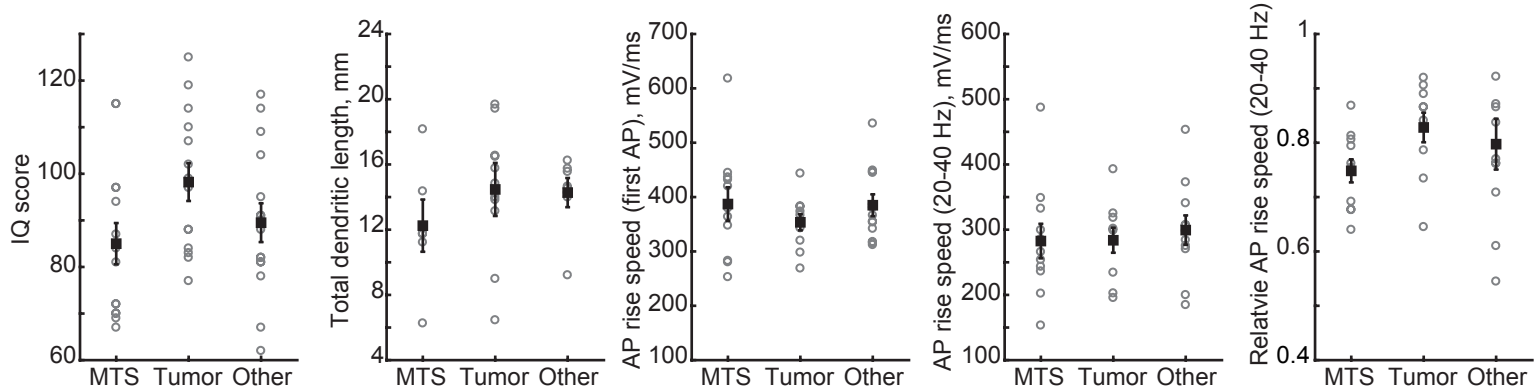

Supplement: supp [file elife-41714-supp-v1.zip › elife_poa_e41714_Figure_1_figure_supplement_2.pdf]

## IQ SCORE

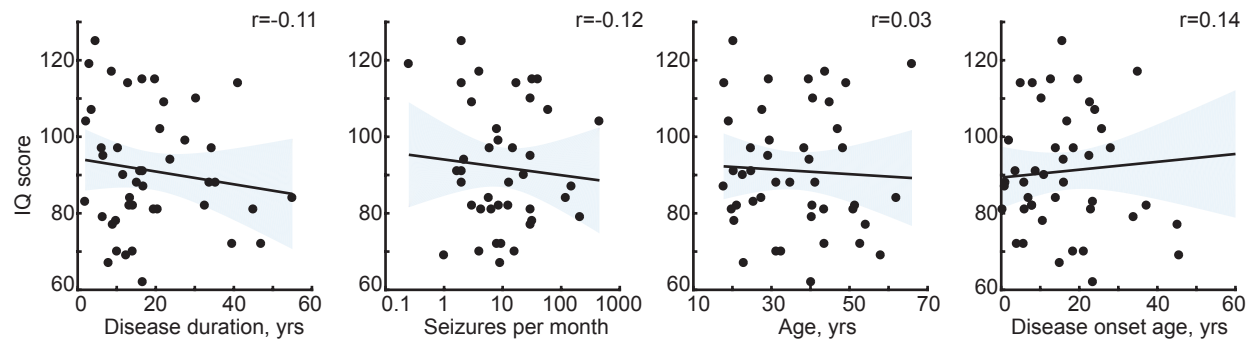

## TOTAL DENDRITIC LENGTH

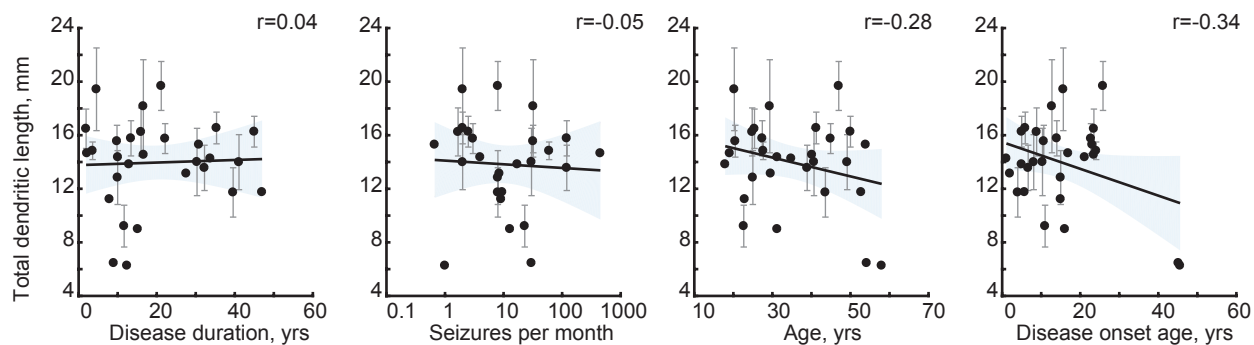

## AP RISE SPEED

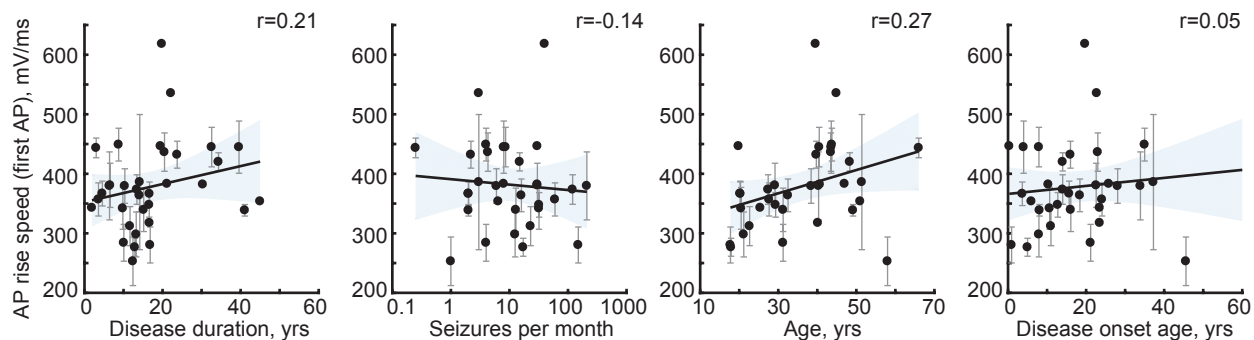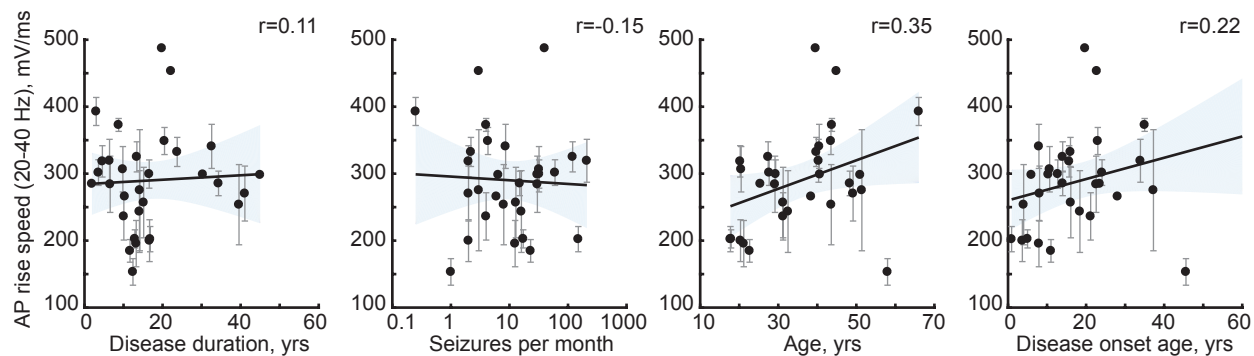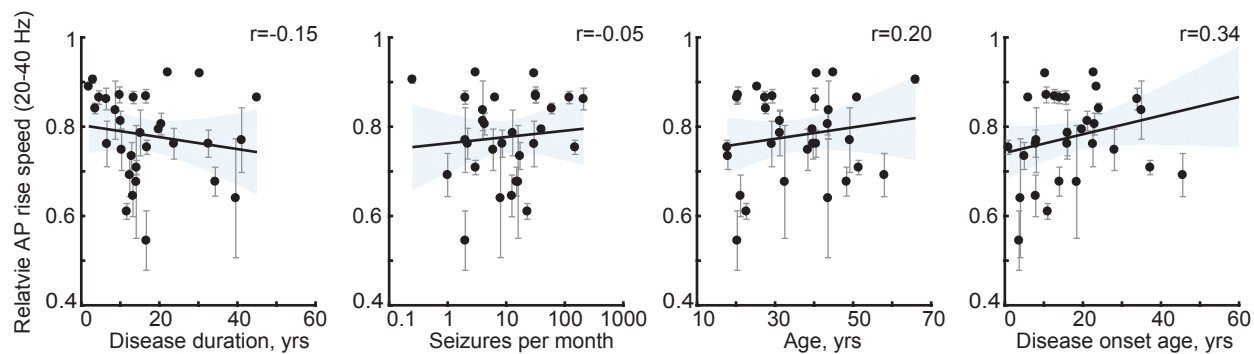

Supplement: supp [file elife-41714-supp-v1.zip › elife_poa_e41714_Figure_1_figure_supplement_1.pdf]
